# Supplementary material
Source: publisher figshare collection journal article supplement (https://acs.figshare.com/ndownloader/files/28693764)
Supplement: Supplementary file 1 [file 28693764]

**Supporting Information**  
**Characterization of free and bound monoterpene alcohols during Riesling fermentation**  
 Andrew J. Caffrey, Larry A. Lerno, Jerry Zweigenbaum, and Susan E. Ebeler

**Supplementary Table S1.** Monoterpenic related compounds found by SIM/Scan data with GC/MS.

| Retention Time (min) | Compound                         | Calculated Retention Index (CRI) | <i>m/z</i> <sup>a</sup> |
|----------------------|----------------------------------|----------------------------------|-------------------------|
| 25.00                | Linalool <sup>b</sup>            | 1585                             | 59, 93, 154             |
| 28.10                | Geranyl ethyl ether              | 1521                             | 69, 93, 121             |
| 30.77                | $\alpha$ -Terpineol <sup>b</sup> | 1713                             | 71, 93, 111             |
| 37.21                | Geranyl formate                  | 1732                             | 69, 93, 121             |
| 39.88                | Nerol <sup>b</sup>               | 1807                             | 41, 68, 69, 93, 154     |
| 41.65                | Geraniol <sup>b</sup>            | 1868                             | 41, 68, 69, 93, 154     |

<sup>a</sup> *m/z* indicates the fragments utilized for semi-quantitation

<sup>b</sup>Compounds identified in SIM mode as described by Hendrickson et al. (2016)

**Supplementary Table S2.** Terpene products formed from hydrolysis of isolated glycosides.

| Retention Time (min) | Compound                | Enzyme Hydrolysis <sup>a</sup> | Acid Hydrolysis <sup>b</sup>                                  |
|----------------------|-------------------------|--------------------------------|---------------------------------------------------------------|
| 8.89                 | pentose-hexose-linalool | linalool                       | linalool, $\alpha$ -terpineol                                 |
| 9.56                 | pentose-hexose-linalool | linalool                       | linalool, $\alpha$ -terpineol                                 |
| 10.41                | pentose-hexose-linalool | linalool                       | linalool, $\alpha$ -terpineol, geraniol, nerol, geranic oxide |
| 10.78                | pentose-hexose-linalool | linalool                       | linalool, $\alpha$ -terpineol, geraniol, nerol, geranic oxide |
| 11.45                | pentose-hexose-nerol    | nerol                          | linalool, $\alpha$ -terpineol, geraniol, nerol, geranic oxide |
| 11.95                | pentose-hexose-geraniol | geraniol                       | linalool, $\alpha$ -terpineol, geraniol, nerol, geranic oxide |
| 13.12                | pentose-hexose-geraniol | geraniol                       | linalool, $\alpha$ -terpineol, geraniol, nerol                |
| 14.44                | pentose-hexose-geraniol | geraniol                       | linalool, $\alpha$ -terpineol, geraniol, nerol                |

<sup>a</sup> Compounds listed within this column correspond to volatile compounds detected from isolated glycoside samples that underwent enzyme hydrolysis.

<sup>b</sup> Compounds listed within this column correspond to volatile compounds detected from isolated glycoside samples that underwent acid hydrolysis.

**Supplementary Table S3.** Volatile terpene related compounds identified in Riesling grapes and wine in 2018 and 2019.

| 2018 Grapes & Wine | 2019 Grapes & Wine  |
|--------------------|---------------------|
| linalool           | linalool            |
| nerol              | nerol               |
| geraniol           | geraniol            |
|                    | geranyl ethyl ether |
|                    | geranyl formate     |
